# Supplementary material
Source: Research Square preprint supplement (doi:10.21203/rs.3.rs-8432416/v1)
Supplement: Supplementary file 1 [file c226b0b8921c85b508c184d3.docx]

# **Shared space use and avoidance among groups of wild non-territorial Assamese macaques**

**Behavioral Ecology and Sociobiology**

**Sofya Dolotovskaya1,2, Suthirote Meesawat3,4, Suchinda Malaivijitnond3,4, Piya Saisawatdikul1,2, Oliver Schülke1,2,5 & Julia Ostner1,2,5**

1Department of Behavioral Ecology, University of Göttingen, Göttingen, Germany

2Social Evolution in Primates Group, German Primate Center Leibniz Institute for Primate Research, Göttingen, Germany

3Department of Biology, Faculty of Science, Chulalongkorn University, Bangkok, Thailand

4National Primate Research Center of Thailand, Chulalongkorn University, Saraburi, Thailand

5Leibniz ScienceCampus Primate Cognition, German Primate Center, Leibniz Institute for Primate Research, Göttingen, Germany

Corresponding author: Sofya Dolotovskaya, e-mail: s.dolotovskaya@gmail.com

Table S1. 3-month and annual defendability indices for each group. To compare D-index on two temporal scales, annual and 3-month, we averaged 3-month D-indices for each group/year for which at least two 3-month intervals were available. These mean 3-month D-indices were then compared with annual D-indices for corresponding years

|  | **Mot** | **Mst** | **Sot** | **Sst** |
| --- | --- | --- | --- | --- |
| II/2014 |  | 1.08 |  |  |
| III/2014 |  | 0.96 |  |  |
| **mean 2013/2014** |  | **1.02** |  |  |
| **annual 2013/2014** |  | **0.85** |  |  |
| IV/2014 | 0.47 | 0.71 |  |  |
| I/2015 | 0.65 | 0.80 |  |  |
| II/2015 | 0.66 | 0.84 |  |  |
| III/2015 | 0.73 | 1.17 |  |  |
| **mean 2014/2015** | **0.63** | **0.88** |  |  |
| **annual 2014/2015** | **0.62** | **0.72** |  |  |
| IV/2015 | 0.67 | 0.76 | 0.95 |  |
| I/2016 | 0.68 | 0.79 | 0.78 |  |
| II/2016 | 0.91 | 1.10 |  | 0.81 |
| III/2016 | 0.89 | 0.81 |  | 0.94 |
| **mean 2015/2016** | **0.79** | **0.86** | **0.87** | **0.87** |
| **annual 2015/2016** | **0.64** | **0.69** | **0.81** | **0.76** |
| IV/2016 | 0.79 | 0.72 |  | 1.12 |
| I/2017 | 0.58 | 0.96 |  |  |
| II/2017 | 0.56 | 1.04 |  | 1.05 |
| III/2017 | 0.61 | 1.03 |  |  |
| **mean 2016/2017** | **0.63** | **0.94** |  | **1.08** |
| **annual 2016/2017** | **0.58** | **0.80** |  | **0.92** |
| IV/2017 | 0.64 | 0.60 |  | 0.80 |
| I/2018 | 0.51 | 1.05 |  |  |
| II/2018 | 0.65 | 0.97 |  | 0.96 |
| III/2018 | 1.22 | 0.98 |  |  |
| **mean 2017/2018** | **0.77** | **0.90** |  | **0.88** |
| **annual 2017/2018** | **0.72** | **0.83** |  | **0.77** |

Table S2. Overlap between annual home ranges (95% kernel) and core areas (50% kernel) of neighboring groups. Shown are percentages of home range/core area shared with home ranges or core areas, respectively, of neighboring habituated groups, only for years when data for all four groups were available

| **Year** | **Mot** | | **Mst** | | **Sot** | | **Sst** | |
| --- | --- | --- | --- | --- | --- | --- | --- | --- |
|  | % shared home range | % shared core area | % shared home range | % shared core area | % shared home range | % shared core area | % shared home range | % shared core area |
| **2014/2015** | 78.8 | 33.6 | 99.9 | 76.4 | 71.2 | 41.0 | 60.2 | 21.1 |
| **2015/2016** | 48.1 | 35.3 | 97.4 | 48.7 | 51.1 | 12.5 | 79.9 | 11.1 |
| **2016/2017** | 30.1 | 13.7 | 78.5 | 31.4 | 45.1 | 20.4 | 82.8 | 13.3 |
| **mean** | **52.3** | **27.5** | **91.9** | **52.2** | **55.8** | **24.6** | **74.3** | **15.2** |

Table S3. Percentages of 3-month home ranges (95% kernel) overlapped by home ranges of neighboring groups, shown for years when data for all four groups were available (quartal IV of 2017 is excluded as no data for group Sot was available), with mean 3-month overlaps calculated for each year compared with the overlaps of annual home ranges calculated for the same year

|  | **Mot** | **Mst** | **Sot** | **Sst** |
| --- | --- | --- | --- | --- |
| IV/2014 | 49.4 | 81.5 | 81.7 | 41.7 |
| I/2015 | 74.9 | 58.4 | 84.7 | 5.1 |
| II/2015 | 84.1 | 97.1 | 87.9 | 58.6 |
| III/2015 | 52.4 | 100 | 57.4 | 70.5 |
| **mean 3-month overlap for 2014/2015** | **65.2** | **84.3** | **77.9** | **44.0** |
| **annual overlap 2014/2015** | **78.8** | **99.9** | **71.2** | **60.2** |
| IV/2015 | 44.5 | 95.8 | 62.4 | 54.6 |
| I/2016 | 39.4 | 64.8 | 47 | 49.5 |
| II/2016 | 0 | 48.2 | 28.9 | 33.4 |
| III/2016 | 36.6 | 88 | 45.5 | 99.5 |
| **mean 3-month overlap for 2015/2016** | **30.1** | **74.2** | **46.0** | **59.3** |
| **annual overlap 2015/2016** | **48.1** | **97.4** | **51.1** | **79.9** |
| IV/2016 | 37.7 | 62.3 | 47.7 | 95.8 |
| I/2017 | 31.7 | 70.1 | 38.3 | 65.6 |
| II/2017 | 22.6 | 89.7 | 37.6 | 86.9 |
| **mean 3-month overlap for 2016/2017** | **30.7** | **74.0** | **41.2** | **82.8** |
| **annual overlap 2016/2017** | **30.1** | **78.5** | **45.1** | **82.8** |
